# Supplementary material for: Plug-and-Play Pairing via Defined Divalent Streptavidins
Source: PubMed Central journal article supplement (PMC4047826; doi:10.1016/j.jmb.2013.09.016), 2014-01-09
Supplement: mmc1.pdf [file mmc1.pdf]

## **Supplementary Material for**

### **Plug-and-Play Pairing via Defined Divalent Streptavidins**

**Michael Fairhead<sup>1</sup>, Denis Krndija<sup>1,2</sup>, Ed D. Lowe<sup>1</sup> and Mark Howarth<sup>1\*</sup>**

*<sup>1</sup>Department of Biochemistry, University of Oxford, South Parks Road, Oxford, OX1 3QU, UK <sup>2</sup>Current address: Institut Curie, 12 rue Lhomond, 75005 Paris, France*

*\*Corresponding author: [mark.howarth@bioch.ox.ac.uk](mailto:mark.howarth@bioch.ox.ac.uk)*

(a)

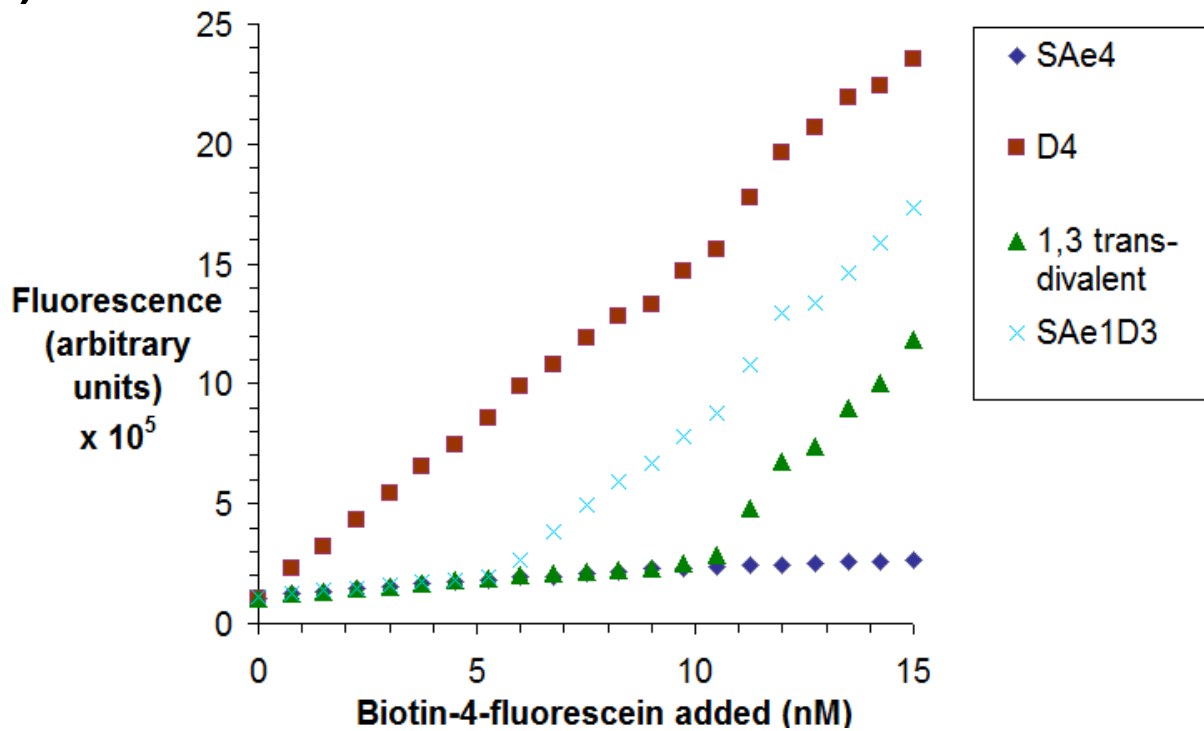

(b)

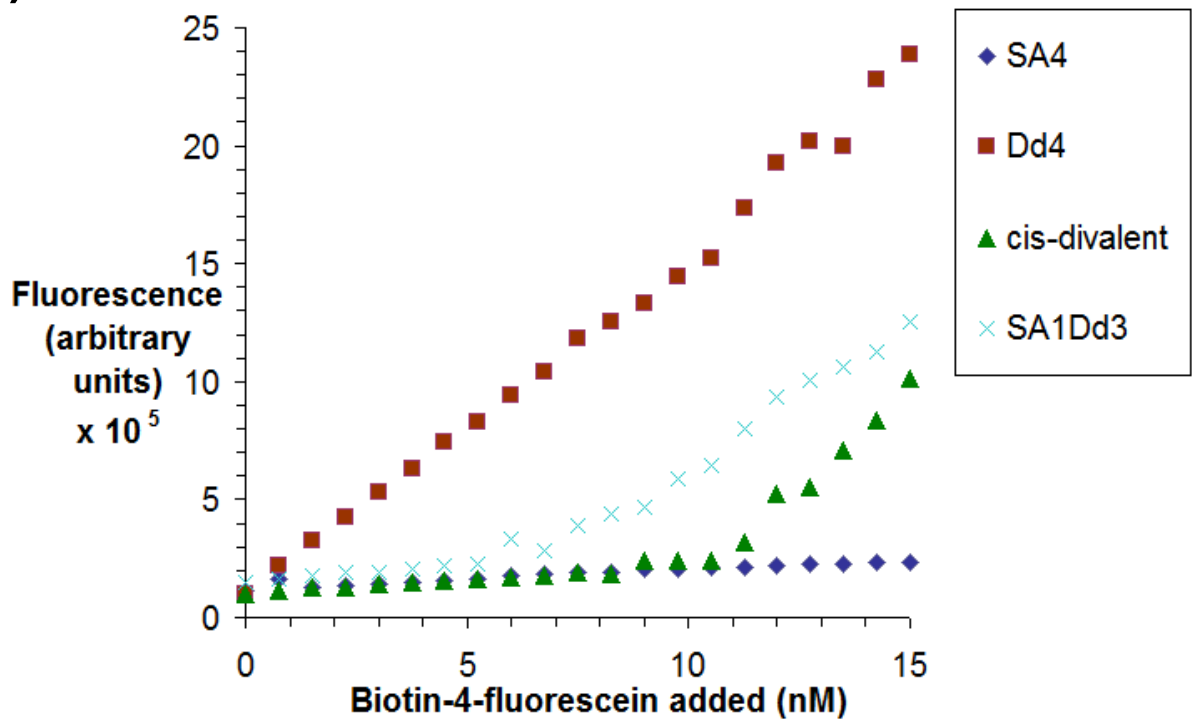

**Supplementary Figure S1. Titration of biotin-binding sites.** 20 nM of each streptavidin variant (monomer concentration) was incubated with the indicated concentration of biotin-4-fluorescein for 1 h and then fluorescence was measured. As [biotin-4-fluorescein] increases, fluorescence increases slowly at concentrations where all is being bound by streptavidin, but once the biotin-binding sites are saturated, fluorescence increases rapidly.

**Chain a**

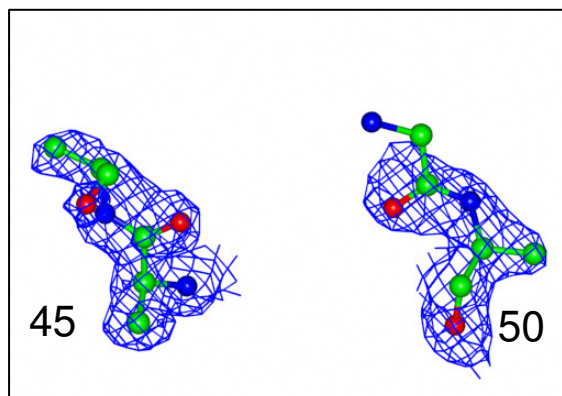

**Chain b**

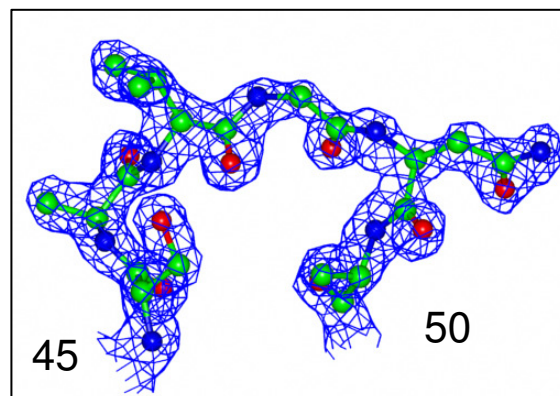

**Chain c**

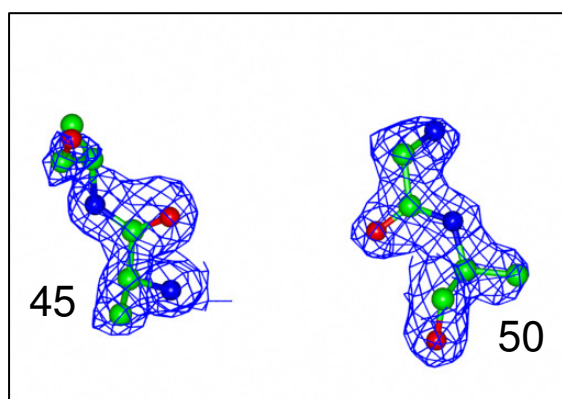

**Chain d**

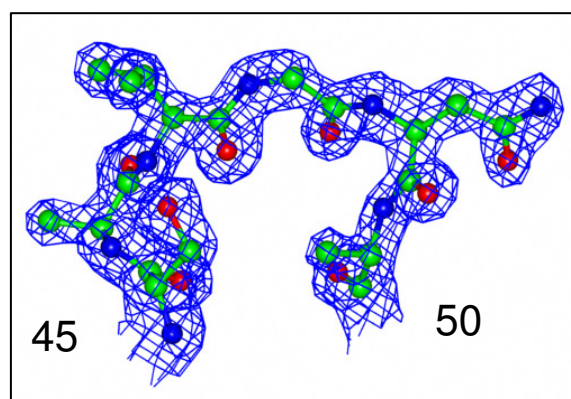

**Supplementary Figure S2.** Electron density around residues 45-50 in chains a-d of cis-divalent streptavidin ( $2F_o - F_c$  contoured at 1 rmsd). Residues in stick format are shown surrounded by the observed electron density (blue mesh).

**(a)**

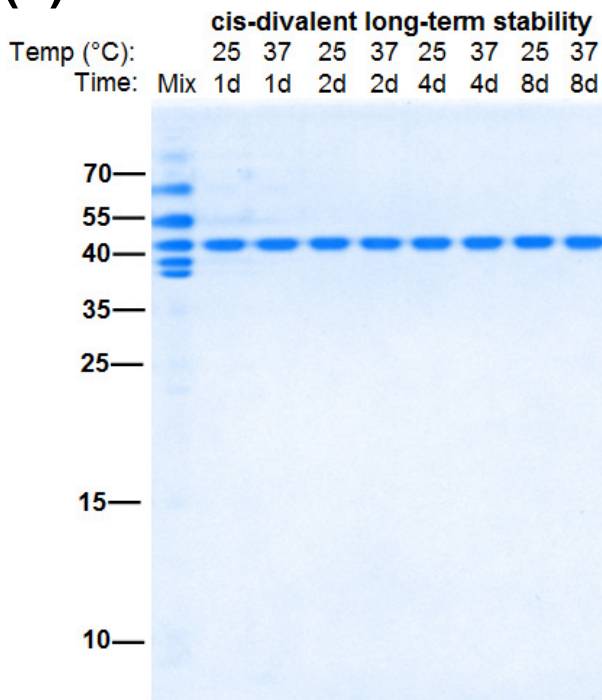

**(b)**

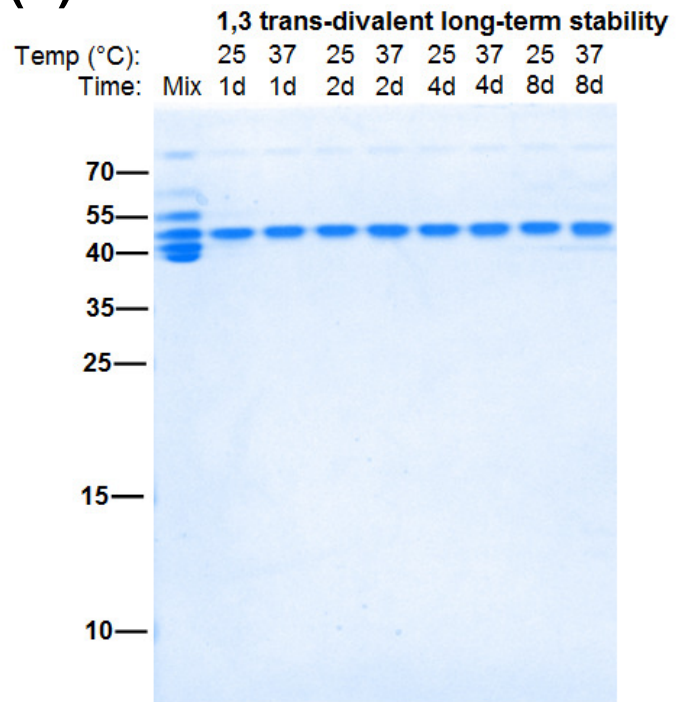

**Supplementary Figure S3. Stability over time of cis- and 1,3 trans-divalent streptavidins.** 10  $\mu$  M cis-divalent or 1,3 trans-divalent streptavidin was incubated in PBS at 25°C or 37°C for 1, 2, 4 or 8 days (d). The samples without boiling were then analyzed by SDS-PAGE with Coomassie staining, to check for tetramer rearrangement or dissociation to monomers. The original mixture of unpurified tetramer forms (Mix) provided a reference as to the mobility of possible rearranged products.

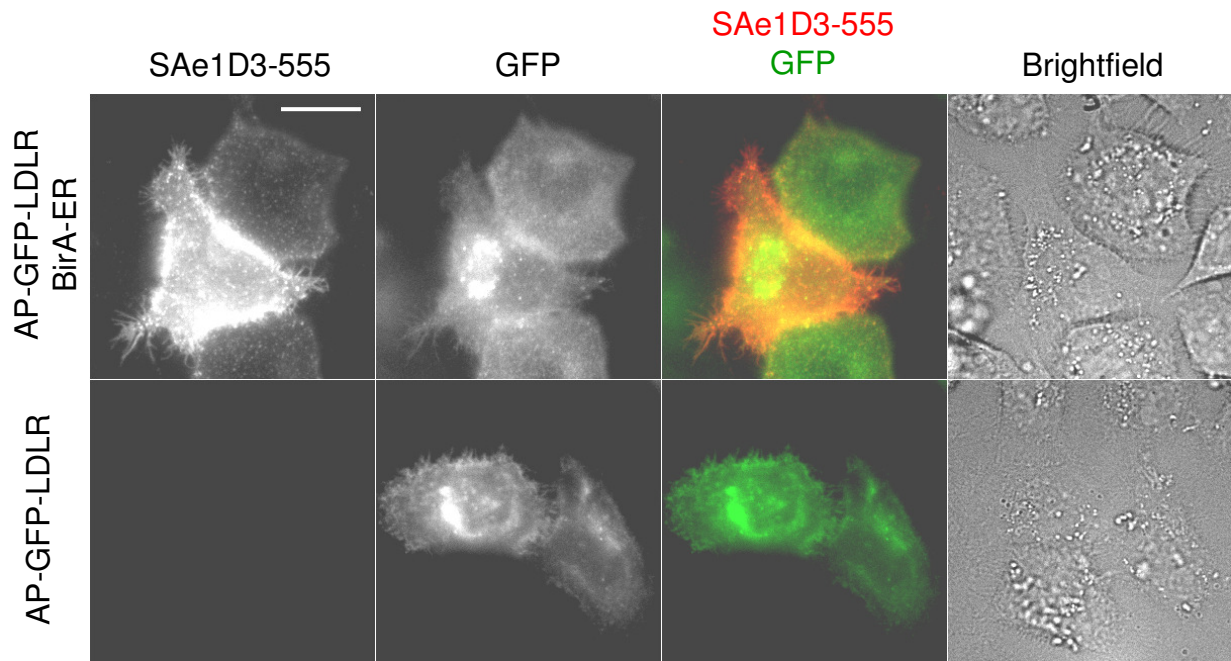

**Supplementary Figure S4. Labeling of LDL receptor with SAe1D3.** HeLa cells were either co-transfected with AP-GFP-LDLR and BirA-ER (top row) or AP-GFP-LDLR alone (bottom row) and stained with SAe1D3-AlexaFluor 555 before live cell wide-field fluorescence microscopy. Images are shown of SAe1D3-AlexaFluor 555 (left, grayscale), GFP (center left, grayscale), a merge (center right) of SAe1D3-555 (red) and GFP (green), and the brightfield image (right, grayscale). Scale-bar 20  $\mu$  m.
